# Supplementary material for: The Foster Parent Experience: A Qualitative Study
Source: Springer Nature journal article supplement (doi:10.1007/s40265-021-01541-x), 2001-01-01
Supplement: MOESM1 [file 24122788]

## Fuzuloparib: Adis Evaluation

### Key Points

- A small molecule PARP inhibitor is being developed by Jiangsu Hengrui Pharmaceuticals Co., Ltd. (formerly Jiangsu Hengrui Medicine Co., Ltd.) for the treatment of ovarian cancer and other solid cancers
- Received its first approval on 11 Dec 2020 in China
- Approved for use in platinum-sensitive recurrent ovarian cancer, fallopian tube cancer or primary peritoneal cancer in patients with germline BRCA mutation who have undergone second-line or above chemotherapy

### Summary

Fuzuloparib (AiRuiYi®, 艾瑞颐; formerly fluzoparib) is a small molecule, orally active PARP inhibitor being developed by Jiangsu Hengrui Pharmaceuticals Co., Ltd. (formerly Jiangsu Hengrui Medicine Co., Ltd.) for the treatment of solid cancers.

Fuzuloparib has been approved in China for the treatment of platinum-sensitive recurrent ovarian cancer, fallopian tube cancer or primary peritoneal cancer in patients with germline BRCA mutation who have undergone second-line or above chemotherapy.

Phase II and III trials are investigating fuzuloparib for the treatment of other solid cancers, including cancers of the pancreas, breast, prostate and lungs.

This summary represents the opinions of the author. For a full list of declarations, including funding and author disclosure statements, please see the full text online. © Springer Nature Switzerland AG 2021.
